# Supplementary material
Source: PubMed Central journal article supplement (PMC3258933)

MOLECULAR BASIS OF S-LAYER GLYCOPROTEIN GLYCAN BIOSYNTHESIS  
IN *GEOBACILLUS STEAROTHERMOPHILUS*\*

Kerstin Steiner<sup>‡,1</sup>, René Novotny<sup>‡,2</sup>, Daniel B. Werz<sup>§,3</sup>, Kristof Zarschler<sup>‡</sup>, Peter H. Seeberger<sup>§</sup>,  
Andreas Hofinger<sup>‡</sup>, Paul Kosma<sup>‡</sup>, Christina Schäffer<sup>‡,4</sup>, and Paul Messner<sup>‡,4</sup>

SUPPLEMENTARY METHODS

*Materials*-All chemicals used were reagent grade and used as supplied except where noted. Dichloromethane (CH<sub>2</sub>Cl<sub>2</sub>) was purchased from JT Baker and purified by a Cycle-Tainer Solvent Delivery System. Pyridine was refluxed over calcium hydride and distilled prior to use. Analytical thin-layer chromatography was performed on E. Merck silica gel 60 F<sub>254</sub> plates (0.25 mm). Compounds were visualized by dipping the plates in a cerium sulfate ammonium molybdate solution or a sulfuric acid/methanol solution followed by heating. Liquid chromatography was performed using forced flow of the indicated solvent on Sigma H-type silica (10–40 mm). <sup>1</sup>H NMR spectra were obtained on a Varian VXR-300 (300 MHz), Bruker-600 (600 MHz) and are reported in parts per million (δ) relative to CHCl<sub>3</sub> (7.26 ppm) or in the case of CD<sub>3</sub>OD as solvent relative to TMS (0.00 ppm). Coupling constants (*J*)<sup>1</sup> are reported in Hertz. <sup>13</sup>C NMR spectra were obtained on a Varian VXR-300 (75 MHz), Bruker-600 (150 MHz) and are reported in δ relative to CDCl<sub>3</sub> (77.0 ppm) as an internal reference or to TMS (0.00 ppm).

*Synthesis of acceptor substrate*-The synthesis of the β-D-Gal-(1→*O*)-octyl (**I**), α-L-Rha-(1→3)-β-D-Gal-(1→*O*)-octyl (**II**) and α-L-Rha-(1→3)-α-L-Rha-(1→3)-β-D-Gal-(1→*O*)-octyl (**III**) acceptors is shown in Fig. S1. Building block dibutyl 4,6-di-*O*-benzyl-3-*O*-fluorenylmethoxycarbonyl-2-*O*-pivaloyl-β-D-galactopyranosyl phosphate **a** (27) was reacted using common glycosylation conditions with 1-octanol to afford **b**. Fmoc deprotection furnished compound **c** (*n*-octyl 4,6-di-*O*-benzyl-2-*O*-pivaloyl-β-D-galactopyranoside), which served as a starting point for the synthesis of all three substrates. For the synthesis of the trisaccharide (**III**) an (2+1) approach was envisioned. For this approach the dirhamnose building block **f** was synthesized. The MP protected rhamnose unit **d** (28) was glycosylated at 0 °C with another rhamnose fragment to furnish **e**. A removal of the MP group using cerium ammonium nitrate (CAN) in aqueous solution and the subsequent reaction with trichloroacetonitrile yielded the dirhamnose building block **f** in good yield.

A removal of the pivaloyl group of compound **c** using strong basic conditions and the global deprotection of all the benzyl groups afforded β-D-Gal-(1→*O*)-octyl (**I**). For the synthesis of disaccharide (**II**), compound **c** was glycosylated using a rhamnose building block with Ac in position 2 to ensure α-selectivity. Column chromatography to purify the reaction products yielded an inseparable mixture of the desired compound together with (Overman)-rearranged trichloroacetimidate. Therefore, this mixture was subjected to basic deprotection removing acetyl (Ac) and pivaloyl (Piv) moieties. Using this approach disaccharide **g** was obtained as a pure compound. Global deprotection using Pd(OH)<sub>2</sub>/C and H<sub>2</sub> in methanol/dichloromethane afforded disaccharide (**II**).

Glycosylating agent **f** as well as octyl galactoside **c** were utilized for the assembly of the trisaccharide **h**. A deprotection of all ester moieties followed by a hydrogenation in order to remove all benzyl groups afforded the completely deprotected trisaccharide (**III**). All the deprotected trisaccharide was purified by silica gel chromatography using mixtures of dichloromethane/methanol in order to remove all traces of palladium which could cause problems in biological experiments.

*n*-Octyl 4,6-Di-*O*-benzyl-2-*O*-pivaloyl-β-D-galactopyranoside (**c**)-Compound **a** (960 mg, 1.14 mmol) (27) was azeotroped three times with toluene and dried *in vacuo*. Dichloromethane (25 ml) were added and the solution cooled to -40 °C. 1-Octanol (296 mg, 359 μl, 2.28 mmol) and afterwards TMSOTf (253 mg, 206 μl, 1.14 mmol) were added. The mixture was stirred for 1 h and quenched by addition of some drops of pyridine before the solvent was removed *in vacuo*. The resulting crude product was purified by flash chromatography (5:1 hexane/EtOAc) to afford 631 mg (71%) of **b** as a colorless oil. Compound **b** (585 mg, 0.75 mmol) was dissolved in 8 ml of DMF. Piperidine (2 ml) was added and the mixture stirred for 90 min at room temperature. The solvent was removed *in vacuo* and the residue purified by column chromatography (4:1, hexane/EtOAc) to afford 413 mg (99%) of **c** as a

colorless oil:  $[\alpha]_D$ : +17.0 ( $c = 0.41$ ,  $\text{CHCl}_3$ ). IR (thin film,  $\text{CHCl}_3$ ): 3000, 1742, 1440, 1260, 1077  $\text{cm}^{-1}$ .  $^1\text{H}$  NMR ( $\text{CDCl}_3$ , 300 MHz)  $\delta$  0.90 (t,  $J = 6.4$  Hz, 3H), 1.25 (s, 9H), 1.28 (b, 10H), 1.55 (b, 2H), 2.39 (d,  $J = 9.6$  Hz, 2H), 3.45 (quart,  $J = 6.9$  Hz, 1H), 3.65 (m, 4H), 3.86 (m, 2H), 4.38 (d,  $J = 7.8$  Hz, 1H), 4.52 (m, 2H), 4.71 (s, 2H), 5.00 (dd,  $J = 10.2, 7.8$  Hz, 1H), 7.25-7.39 (m, 10H).  $^{13}\text{C}$  NMR ( $\text{CDCl}_3$ , 75 MHz)  $\delta$  14.2, 22.8, 26.1, 27.2, 29.3, 29.5, 29.7, 31.9, 38.9, 68.3, 69.8, 73.4, 73.5, 75.4, 76.5, 101.0, 127.8, 128.0, 128.1, 128.4, 128.4, 137.6, 138.0, 178.5. ESI-MS:  $m/z$   $[\text{M} + \text{Na}]^+$  calculated 579.3292, observed 579.3283.

***p*-Methoxyphenyl 2-*O*-Acetyl-3,4-di-*O*-benzyl- $\alpha$ -L-rhamnopyranosyl-(1 $\rightarrow$ 3)-2-*O*-acetyl-4-*O*-benzyl- $\alpha$ -L-rhamnopyranoside (e)**-Rhamnose building block **d** (237 mg, 0.589 mmol) (**28**) and rhamnosyl trichloroacetimidate (406 mg, 0.766 mmol) (**26**) were azeotroped three times with toluene and dried *in vacuo*. Dichloromethane (9 ml) were added and the solution cooled to 0  $^\circ\text{C}$ . TMSOTf (20 mg, 11  $\mu\text{l}$ , 0.09 mmol) was added. The mixture was stirred for 90 min and quenched by addition of some drops of pyridine. Afterwards the solvent was removed *in vacuo*. The resulting crude product was purified by column chromatography (7:3, hexane/EtOAc) to afford 448 mg (98%) of **e** as a colorless oil:  $[\alpha]_D$ : -45.3 ( $c = 1.08$ ,  $\text{CHCl}_3$ ). IR (thin film,  $\text{CHCl}_3$ ): 3005, 2933, 1739, 1585, 1503, 1456, 1369, 1226, 1097, 1046  $\text{cm}^{-1}$ .  $^1\text{H}$  NMR ( $\text{CDCl}_3$ , 300 MHz)  $\delta$  1.32 (pt,  $J = 7.2$  Hz, 6H), 2.15 (s, 3H), 2.17 (s, 3H), 3.47 (t,  $J = 9.6$  Hz, 1H), 3.54 (t,  $J = 9.6$  Hz, 1H), 3.77 (s, 3H), 3.84 (m, 1H), 3.92 (m, 2H), 4.34 (dd,  $J = 9.3$  Hz, 3.3 Hz, 1H), 4.48 (d,  $J = 11.4$  Hz, 1H), 4.62-4.68 (m, 3H), 4.85 (d,  $J = 10.8$  Hz, 1H), 4.93 (d,  $J = 11.1$  Hz, 1H), 5.11 (ps, 1H), 5.32 (m, 1H), 5.37 (ps, 1H), 5.49 (m, 1H), 6.81 (pd,  $J = 9.3$  Hz, 2H), 6.97 (pd,  $J = 9.3$  Hz, 2H), 7.25-7.39 (m, 15H).  $^{13}\text{C}$  NMR ( $\text{CDCl}_3$ , 75 MHz)  $\delta$  18.0, 18.1, 21.4, 21.2, 55.7, 68.4, 68.8, 69.1, 71.7, 72.1, 75.3, 75.5, 77.6, 79.8, 80.1, 95.9, 99.8, 114.5, 117.6, 127.6, 127.8, 127.8, 127.9, 127.9, 128.3, 128.4, 137.8, 138.3, 149.9, 154.9, 170.0, 170.1. MALDI-MS:  $m/z$   $[\text{M} + \text{Na}]^+$  calculated 793.3195, observed 793.3182.

**2-*O*-Acetyl-3,4-di-*O*-benzyl- $\alpha$ -L-rhamnopyranosyl-(1 $\rightarrow$ 3)-2-*O*-acetyl-4-*O*-benzyl- $\alpha$ -L-rhamnopyranosyl trichloroacetimidate (f)**-Disaccharide **e** (420 mg, 0.545 mmol) was suspended in a mixture of acetonitrile and water (20 ml, 1:1). The mixture was stirred for 2 h at room temperature until TLC control experiments showed that no starting material was left. The mixture was poured onto brine and extracted 2x with EtOAc. The combined organic phases were washed twice with water, dried over  $\text{Na}_2\text{SO}_4$  and concentrated. The resulting crude product was purified by column chromatography (2:1, hexane/EtOAc) to afford 334 mg (92%) of the hemiacetal as a colorless oil. This hemiacetal (285 mg, 0.429 mmol) was dissolved in dichloromethane (5 ml) and trichloroacetonitrile (5 ml). NaH (5 mg) was added and the mixture was stirred for 90 min at room temperature. The solvent was removed *in vacuo*, column chromatography (3:1, hexane/EtOAc) furnished 305 mg (88%) of **f** as a slightly yellow oil:  $[\alpha]_D$ : -29.0 ( $c = 0.70$ ,  $\text{CHCl}_3$ ). IR (thin film,  $\text{CHCl}_3$ ): 2995, 1744, 1672, 1615, 1451, 1369, 1092  $\text{cm}^{-1}$ .  $^1\text{H}$  NMR ( $\text{CDCl}_3$ , 300 MHz)  $\delta$  1.29 (d,  $J = 6.3$  Hz, 3H), 1.36 (d,  $J = 6.0$  Hz, 3H), 2.14 (s, 3H), 2.17 (s, 3H), 3.46 (t,  $J = 9.3$  Hz, 1H), 3.59 (t,  $J = 9.6$  Hz, 1H), 3.82 (m, 1H), 3.88-3.99 (m, 2H), 4.25 (dd,  $J = 9.6$  Hz, 3.3 Hz, 1H), 4.51 (d,  $J = 11.1$  Hz, 1H), 4.62-4.70 (m, 3H), 4.84 (d,  $J = 11.1$  Hz, 1H), 4.92 (d,  $J = 11.1$  Hz, 1H), 5.09 (ps, 1H), 5.31 (m, 1H), 5.50 (m, 1H), 6.21 (ps, 1H), 7.26-7.39 (m, 15H), 8.71 (s, 1H).  $^{13}\text{C}$  NMR ( $\text{CDCl}_3$ , 75 MHz)  $\delta$  18.0, 18.1, 21.1, 21.1, 68.9, 69.0, 70.7, 70.7, 71.7, 75.2, 75.7, 76.1, 79.7, 79.8, 90.8, 94.3, 99.7, 127.6, 127.6, 127.9, 128.0, 128.3, 128.3, 128.4, 137.5, 137.8, 138.3, 159.9, 169.7, 169.9. MALDI-MS:  $m/z$   $[\text{M} + \text{Na}]^+$  calculated 830.1872, observed 830.1858.

***n*-Octyl  $\beta$ -D-galactopyranoside (I)**-Monosaccharide **c** (255 mg, 0.459 mmol) was dissolved in THF (20 ml), LiOH solution (1 M, 25 ml) and hydrogen peroxide solution (15 ml) were added at -5  $^\circ\text{C}$ . The reaction mixture was stirred for 2 days while warming to room temperature. Then methanol (15 ml) and potassium hydroxide (3 M, 30 ml) were added and stirred for 2 days. Hydrochloric acid (1 M) was added until pH 7 was reached. The neutral solution was extracted three times with dichloromethane, dried over  $\text{MgSO}_4$ , filtered and concentrated. Column chromatography (EtOAc) furnished 209 mg (97%) of a colorless solid. This compound (148 mg, 0.263 mmol) was dissolved in methanol (15 ml),  $\text{Pd}(\text{OH})_2/\text{C}$  (15 mg) was added and the Ar atmosphere replaced by a  $\text{H}_2$  atmosphere. The reaction mixture was stirred for 12 h. Filtration through a plug of celite removed all solids. Column chromatography using silica gel and dichloromethane/methanol (1:1) in order to remove traces of Pd yielded 75 mg (98%) of **I** as a colorless wax:  $[\alpha]_D$ : -10.0 ( $c = 0.13$ ,  $\text{H}_3\text{COH}$ ).  $^1\text{H}$  NMR ( $\text{CD}_3\text{OD}$ , 300 MHz)  $\delta$  0.89 (b, 3H), 1.29-1.37 (b, 10H), 1.61 (m, 2H), 3.47-3.53 (m, 4H), 3.73 (m,  $J = 6.0$  Hz, 2H), 3.84 (s, b, 1H), 3.88 (m, 1H), 4.20 (d,  $J = 6.6$  Hz, 1H).  $^{13}\text{C}$  NMR ( $\text{CD}_3\text{OD}$ , 75 MHz)  $\delta$

14.0, 23.3, 26.7, 30.0, 30.2, 30.4, 32.6, 62.0, 69.8, 70.4, 72.1, 74.6, 76.1, 104.5. MALDI-MS:  $m/z$  [M + Na]<sup>+</sup> calculated 315.1778, observed 315.1775.

***n*-Octyl 3,4-di-*O*-benzyl- $\alpha$ -L-rhamnopyranosyl-(1 $\rightarrow$ 3)-4,6-di-*O*-benzyl- $\beta$ -D-galactopyranoside (g)**-Compound **c** (185 mg, 0.332 mmol) and rhamnosyl trichloroacetimidate (228 mg, 0.431 mmol) were azeotroped three times with toluene and dried *in vacuo*. Dichloromethane (6 ml) were added and the solution cooled to 0 °C. TMSOTf (11 mg, 9  $\mu$ l, 0.05 mmol) was added. The mixture was stirred for 1 h and quenched by addition of some drops of pyridine. Afterwards the solvent was removed *in vacuo*. The resulting crude product was purified by column chromatography (4:1, hexane/EtOAc) to afford a mixture of disaccharide and rearranged trichloroacetimidate. Also, further attempts to separate the compounds failed. Therefore, the mixture was dissolved in THF (35 ml), LiOH solution (1 M) (19 ml) and hydrogen peroxide solution (12 ml) were added at -5 °C. The reaction mixture was stirred for 30 h while warming to room temperature. Then methanol (17 ml) and potassium hydroxide (3 M, 35 ml) were added and stirred for 3 d. Hydrochloric acid (1 M) was added until pH 7 was reached. The neutral solution was extracted three times with dichloromethane, dried over MgSO<sub>4</sub>, filtered and concentrated. Column chromatography (3:1, hexane/EtOAc) furnished 145 mg (55%) of **g** as a colorless solid:  $[\alpha]_D$ : -41.2 (c = 0.25, CHCl<sub>3</sub>). IR (thin film, CHCl<sub>3</sub>): 3005, 2923, 1600, 1492, 1451, 1082 cm<sup>-1</sup>. <sup>1</sup>H NMR (CDCl<sub>3</sub>, 300 MHz)  $\delta$  0.87 (t,  $J$  = 6.9 Hz, 3H), 1.33 (m, 15H), 1.61 (m, 2H), 2.33 (s, 1H), 2.52 (s, 1H), 3.48 (m, 2H), 3.62 (m, 4H), 3.78-3.92 (m, 7H), 4.20 (m, 2H), 4.46 (m, 2H), 4.52-4.66 (m, 4H), 4.83 (d,  $J$  = 11.7 Hz, 1H), 4.90 (d,  $J$  = 11.1 Hz, 1H), 5.38 (s, 1H), 7.23-7.37 (m, 20H). <sup>13</sup>C NMR (CDCl<sub>3</sub>, 75 MHz)  $\delta$  14.0, 18.0, 22.5, 25.8, 29.1, 29.3, 29.4, 31.7, 68.1, 68.3, 68.6, 70.1, 71.7, 72.6, 73.5, 73.7, 74.9, 75.1, 75.9, 77.9, 79.5, 79.7, 99.9, 103.1, 127.4, 127.6, 127.7, 127.8, 128.1, 128.2, 128.3, 128.4, 137.7, 137.8, 138.4, 138.5. MALDI-MS:  $m/z$  [M + Na]<sup>+</sup> calculated 821.4235, observed 821.4247.

***n*-Octyl  $\alpha$ -L-rhamnopyranosyl-(1 $\rightarrow$ 3)- $\beta$ -D-galactopyranoside (II)**-Disaccharide **g** (103 mg, 0.129 mmol) was dissolved in a mixture of methanol and dichloromethane (30 ml, 2:1), Pd(OH)<sub>2</sub>/C was added and the Ar atmosphere was replaced by a H<sub>2</sub> atmosphere. The reaction mixture was stirred for 12 h. Filtration through a plug of celite removed all solids. Column chromatography using silica gel and dichloromethane/methanol (10:1  $\rightarrow$  3:1) in order to remove traces of Pd yielded 50 mg (quant.) of **(II)** as a colorless solid:  $[\alpha]_D$ : -32.3 (c = 0.13, H<sub>3</sub>COH). <sup>1</sup>H NMR (CD<sub>3</sub>OD, 300 MHz)  $\delta$  0.89 (b, 3H), 1.24-1.36 (b, 13H), 1.61 (m, 2H), 3.31 (s, 2H), 3.39 (m, 1H), 3.51 (m, 2H), 3.63 (m, 1H), 3.71 (m, 3H), 3.92 (m, 3H), 4.23 (d,  $J$  = 7.5 Hz, 1H), 5.05 (s, 1H). <sup>13</sup>C NMR (CD<sub>3</sub>OD, 75 MHz)  $\delta$  14.0, 17.6, 23.3, 26.7, 30.0, 30.1, 30.4, 32.6, 61.8, 69.6, 69.7, 70.5, 71.7, 73.6, 76.0, 81.2, 103.4, 104.5. MALDI-MS:  $m/z$  [M + Na]<sup>+</sup> calculated 461.2357, observed 461.2357.

***n*-Octyl 2-*O*-acetyl-3,4-di-*O*-benzyl- $\alpha$ -L-rhamnopyranosyl-(1 $\rightarrow$ 3)-2-*O*-acetyl-4-*O*-benzyl- $\alpha$ -L-rhamnopyranosyl-(1 $\rightarrow$ 3)-4,6-di-*O*-benzyl-2-*O*-pivaloyl- $\beta$ -D-galactopyranoside (h)**-Galactose building block **c** (100 mg, 0.179 mmol) and rhamnose disaccharide building block **f** (209 mg, 0.258 mmol) were azeotroped three times with toluene and dried *in vacuo*. Dichloromethane (3.5 ml) were added and the solution cooled to 0 °C. TMSOTf (9 mg, 7  $\mu$ l, 0.04 mmol) was added. The mixture was stirred for 120 min and quenched by addition of some drops of pyridine. Afterwards the solvent was removed *in vacuo*. The resulting crude product was purified by column chromatography (4:1, hexane/EtOAc) to afford 164 mg (76%) of **h** as a colorless oil:  $[\alpha]_D$ : -25.8 (c = 0.33, CHCl<sub>3</sub>). IR (thin film, CHCl<sub>3</sub>): 2933, 2871, 1739, 1369, 1072 cm<sup>-1</sup>. <sup>1</sup>H NMR (CDCl<sub>3</sub>, 300 MHz)  $\delta$  0.88 (t,  $J$  = 6.9 Hz, 3H), 1.24-1.34 (m, 25H), 1.58 (m, 2H), 2.10 (s, 3H), 2.13 (s, 3H), 3.41 (m, 4H), 3.64 (ps, 3H), 4.78-4.88 (m, 5H), 4.07 (dd,  $J$  = 10.7, 2.2 Hz, 1H), 4.38 (d,  $J$  = 10.1 Hz, 1H), 4.40-4.68 (m, 7H), 4.80 (d,  $J$  = 12.3 Hz, 1H), 5.91 (m, 3H), 5.17 (ps, 1H), 5.21 (ps, 2H), 7.24-7.39 (m, 25H). <sup>13</sup>C NMR (CDCl<sub>3</sub>, 75 MHz)  $\delta$  14.2, 18.0, 18.2, 21.1, 21.1, 22.8, 26.1, 27.2, 29.3, 29.5, 29.7, 31.9, 38.9, 68.6, 68.7, 68.8, 69.0, 69.7, 71.5, 71.7, 73.5, 73.7, 74.8, 75.0, 75.1, 76.1, 76.2, 77.6, 78.2, 79.8, 80.3, 98.7, 99.1, 101.6, 127.4, 127.4, 127.5, 127.6, 127.7, 127.7, 127.8, 127.8, 128.2, 128.2, 128.3, 128.3, 137.7, 137.8, 137.9, 138.1, 138.5, 169.3, 169.9, 176.5. MALDI-MS:  $m/z$  [M + Na]<sup>+</sup> calculated 1225.6070, observed 1225.6050.

***n*-Octyl  $\alpha$ -L-rhamnopyranosyl-(1 $\rightarrow$ 3)- $\alpha$ -L-rhamnopyranosyl-(1 $\rightarrow$ 3)- $\beta$ -D-galactopyranoside (III)**-Trisaccharide **h** (135 mg, 0.112 mmol) was dissolved in THF (13 mL), LiOH solution (1 M, 7 ml) and hydrogen peroxide solution (5 ml) were added at -5 °C. The reaction mixture was stirred for 3 d while warming to room temperature. Then methanol (7 ml) and potassium hydroxide (3 M, 13 ml) were added and stirred for 2 d. Hydrochloric acid (1 M) was added until pH 7 was reached. The

neutral solution was extracted three times with dichloromethane, dried over MgSO<sub>4</sub>, filtered and concentrated. Mass spectrometry still shows a pivaloyl group in the molecule. Therefore, the crude product was dissolved in methanol (10 ml) and NaOMe (500 mg) were added. The mixture was stirred for 12 h and the solvent removed *in vacuo*. Column chromatography (EtOAc) furnished 102 mg (88%) of a colorless solid. This compound (95 mg, 0.092 mmol) was dissolved in a mixture of methanol (10 ml) and dichloromethane (15 mL), Pd(OH)<sub>2</sub>/C was added and the Ar atmosphere replaced by a H<sub>2</sub> atmosphere. The reaction mixture was stirred for 12 h. Filtration through a plug of celite removed all solids. Column chromatography using silica gel and dichloromethane/methanol (10:1 → 4:1) was performed in order to remove traces of Pd. 38 mg (quant.) of (**III**) as a colorless highly viscous oil were obtained: [α]<sub>D</sub>: -60.5 (c = 1.25, H<sub>3</sub>COH). <sup>1</sup>H NMR (CD<sub>3</sub>OD, 300 MHz) δ 0.89 (b, 3H), 1.24-1.33 (b, 16H), 1.61 (b, 2H), 3.38 (s, 1H), 3.47-3.57 (m, 4H), 3.62-3.92 (m, 9H), 3.99 (s, b, 1H), 4.07 (s, b, 1H), 4.23 (d, *J* = 7.5 Hz, 1H), 5.02 (s, 1H), 5.04 (s, 1H). <sup>13</sup>C NMR (CD<sub>3</sub>OD, 75 MHz) δ 14.0, 17.6, 17.6, 23.3, 26.7, 30.0, 30.1, 30.4, 32.6, 61.8, 69.6, 69.7, 70.0, 70.5, 71.5, 71.7, 72.8, 73.7, 76.0, 79.4, 81.1, 103.4, 103.6, 104.6. MALDI-MS: *m/z* [M + Na]<sup>+</sup> calculated 607.2936, observed 607.2925.

References included in supplementary methods:

26. Fürstner, A., Müller, T. (1999) *J. Am. Chem. Soc.* **121**, 7814-7821
27. Love, K. R., Seeberger, P. H. (2004) *Angew. Chem. Int. Ed.* **43**, 602-605
28. Werz, D. B., Seeberger, P. H. (2005) *Angew. Chem. Int. Ed.* **44**, 6315-6318

<sup>1</sup>The abbreviations used are: Ac, acetyl; Ar, argon; Bn, benzyl; CAN, cerium ammonium nitrate; EtOAc, ethyl acetate; Fmoc, fluorenylmethoxycarbonyl; H<sub>2</sub>, hydrogen; IR, IR spectroscopy; *J*, coupling constant; MP, methoxyphenyl; NaOMe, sodium methoxide; OBU, *O*-butyl; Pd, palladium; Piv, pivaloyl; THF, tetrahydrofuran; TMSOTf, trimethylsilyl trifluoromethanesulfonate.

## SUPPLEMENTARY RESULTS

*Sequence comparison of the transferases WsaC, WsaD, WsaE and WsaF*—WsaC shows homology to the α-1,3-L-rhamnosyltransferases from *Streptococcus pyogenes* MGAS10394 (62) (protein accession number YP\_059939) and MGAS6180 (63) (YP\_280052) as well as to RgpB from *Lactococcus lactis* and *Streptococcus thermophilus*, RgpBc from *Streptococcus mutans*, and Cps2F from *Streptococcus pneumoniae*, and several other enzymes, all of which have been classified as rhamnosyltransferases involved in cell wall biosynthesis (Fig. S2). WsaD shows high homology to the putative rhamnosyltransferase JexE from *Paenibacillus jamilae*, the glycosyltransferases from *Clostridium beijerincki* (protein accession number ZP\_00911019) and *Methanosphaera stadtmanae*, as well as some homology to rhamnosyltransferases from *Shigella dysenteriae* (37) and *Shigella flexneri* (64).

The N-terminal portion of WsaE (aa 70 to 150) revealed homology to methyltransferases *e.g.*, to COG2226.2, UbiE, a menaquinone biosynthesis methyltransferase from *Methanosarcina acetivorans* (65), and to PFAM 08241.1 and PFAM 08242.1 methyltransferase family 11 and 12, respectively, both of which are SAM-dependent methyltransferases (Fig. S2). The central and C-terminal portions contain two glycosyltransferase domains, which are homologous *e.g.*, to the O-antigen biosynthesis protein from *Planctomyces maris* DSM 8797 (ZP\_01855298) and *Xanthomonas oryzae* (ABI93188), or to the GT-2 glycosyltransferases from *Burkholderia cenocepacia* MC0-3 (ZP\_01563358) and from *Enterococcus faecalis* (66) (ORFde16, AAC35930) (Fig. S3). The first glycosyltransferase domain contains motifs that are typical of inverting glycosyltransferases and contains a conserved DD motif (aa 638-639) and, 53 aa downstream, the DXDD motif (DHDD, aa 691-694). The second glycosyltransferase domain contains ED motifs (aa 970-971 and 981-982) and a DXE motif (aa 1062-1064).

Highest homology for WsaF was found to conserved hypothetical proteins from *Planctomyces maris* (ZP\_01855299; 430 aa; E-value: 2e<sup>-89</sup>) and from *Streptococcus pneumoniae* (CAI34499; 414 aa, E-value: 8e<sup>-70</sup>). Homologies to putative glycosyltransferases, for instance, from *Anabaena variabilis* (protein accession number ABA22956; 406 aa, E-value: 6e<sup>-20</sup>) and WbbX (421 aa, E-value: 2e<sup>-08</sup>) from *Yersinia enterocolitica* were found as well.

References included in supplementary results:

37. Morona, R., Macpherson, D. F., Van Den, B. L., Carlin, N. I., and Manning, P. A. (1995) *Mol. Microbiol.* **18**, 209-223
62. Banks, D. J., Porcella, S. F., Barbian, K. D., Beres, S. B., Philips, L. E., Voyich, J. M., DeLeo, F. R., Martin, J. M., Somerville, G. A., and Musser, J. M. (2004) *J. Infect. Dis.* **190**, 727-738
63. Green, N. M., Zhang, S., Porcella, S. F., Nagiec, M. J., Barbian, K. D., Beres, S. B., LeFebvre, R. B., and Musser, J. M. (2005) *J. Infect. Dis.* **192**, 760-770
64. Klena, J. D. and Schnaitman, C. A. (1993) *Mol. Microbiol.* **9**, 393-402
65. Galagan, J. E., Nusbaum, C., Roy, A., Endrizzi, M. G., Macdonald, P., FitzHugh, W., Calvo, S., Engels, R., Smirnov, S., Atnoor, D., Brown, A., Allen, N., Naylor, J., Stange-Thomann, N., DeArellano, K., Johnson, R., Linton, L., McEwan, P., McKernan, K., Talamas, J., Tirrell, A., Ye, W., Zimmer, A., Barber, R. D., Cann, I., Graham, D. E., Grahame, D. A., Guss, A. M., Hedderich, R., Ingram-Smith, C., Kuettner, H. C., Krzycki, J. A., Leigh, J. A., Li, W., Liu, J., Mukhopadhyay, B., Reeve, J. N., Smith, K., Springer, T. A., Umayam, L. A., White, O., White, R. H., Conway, d. M., Ferry, J. G., Jarrell, K. F., Jing, H., Macario, A. J., Paulsen, I., Pritchett, M., Sowers, K. R., Swanson, R. V., Zinder, S. H., Lander, E., Metcalf, W. W., and Birren, B. (2002) *Genome Res.* **12**, 532-542
66. Xu, Y., Murray, B. E., and Weinstock, G. M. (1998) *Infect. Immun.* **66**, 4313-4323

## SUPPLEMENTARY TABLES

**Table S1:** Bacterial strains and plasmids used in this work.

| Strains or plasmids                       | Genotype and relevant characteristics                                                                                                                                                                  | Sources or references |
|-------------------------------------------|--------------------------------------------------------------------------------------------------------------------------------------------------------------------------------------------------------|-----------------------|
| <i>E. coli</i> DH5 $\alpha$ <sup>TM</sup> | F <sup>-</sup> $\phi$ 80 <i>lacZ</i> M15 ( <i>lacZYA-argF</i> ) U169 <i>deoR recA1 endA1 hsdR17 (rk<sup>-</sup>, mk<sup>+</sup>) phoA supE44 thi-1 gyrA96 relA1 <math>\lambda</math></i>               | Invitrogen            |
| <i>E. coli</i> BL21 Star (DE3)            | F <sup>-</sup> <i>ompT hsdSB (rB<sup>-</sup>mB<sup>-</sup>) gal dcm rne131</i>                                                                                                                         | Invitrogen            |
| <i>E. coli</i> C43(DE3)                   | F <sup>-</sup> <i>ompT hsdSB (rB<sup>-</sup>mB<sup>-</sup>) gal dcm</i> (DE3) C43                                                                                                                      | Lucigen (67)          |
| pET28a(+)                                 | <i>E. coli</i> expression vector; Km <sup>R</sup>                                                                                                                                                      | Novagen               |
| pNGB220                                   | pET28a-WsaC; pET28a(+) expressing WsaC (aa 1-324) from <i>G. stearothermophilus</i> NRS 2004/3a with N-terminal His <sub>6</sub> -tag; Km <sup>R</sup>                                                 | This study            |
| pNGB221                                   | pET28a-WsaC_I; pET28a(+) expressing WsaC from <i>G. stearothermophilus</i> NRS 2004/3a devoid of the C-terminal transmembrane domain (aa 1-280) with N-terminal His <sub>6</sub> -tag; Km <sup>R</sup> | This study            |
| pNGB230                                   | pET28a-WsaD; pET28a(+) expressing WsaD (aa 1-289) from <i>G. stearothermophilus</i> NRS 2004/3a with N-terminal His <sub>6</sub> -tag; Km <sup>R</sup>                                                 | This study            |
| pNGB231                                   | pET28a-WsaD_I; pET28a(+) expressing WsaD from <i>G. stearothermophilus</i> NRS 2004/3a devoid of the C-terminal transmembrane domain (aa 1-254) with N-terminal His <sub>6</sub> -tag; Km <sup>R</sup> | This study            |
| pNGB240                                   | pET28a-WsaE; pET28a expressing WsaE (aa 1-1127) from <i>G. stearothermophilus</i> NRS 2004/3a with N-terminal His <sub>6</sub> -tag; Km <sup>R</sup>                                                   | This study            |
| pNGB241                                   | pET28a-WsaE_M; pET28a expressing WsaE_M (aa 1-170) from <i>G. stearothermophilus</i> NRS 2004/3a with N-terminal His <sub>6</sub> -tag; Km <sup>R</sup>                                                | This study            |
| pNGB242                                   | pET28a-WsaE_N; pET28a expressing WsaE_N (aa 1-368) from <i>G. stearothermophilus</i> NRS 2004/3a with N-terminal His <sub>6</sub> -tag; Km <sup>R</sup>                                                | This study            |
| pNGB243                                   | pET28a-WsaE_B; pET28a expressing WsaE_B (aa 368-1127) from <i>G. stearothermophilus</i> NRS 2004/3a with N-terminal His <sub>6</sub> -tag; Km <sup>R</sup>                                             | This study            |
| pNGB244                                   | pET28a-WsaE_C; pET28a expressing WsaE_C (aa 765-1127) from <i>G. stearothermophilus</i> NRS 2004/3a with N-terminal His <sub>6</sub> -tag; Km <sup>R</sup>                                             | This study            |
| pNGB245                                   | pET28a-WsaE_A; pET28a expressing WsaE_A (aa 368-863) from <i>G. stearothermophilus</i> NRS 2004/3a with N-terminal His <sub>6</sub> -tag; Km <sup>R</sup>                                              | This study            |
| pNGB250                                   | pET28a-WsaF; pET28a(+) expressing WsaF (aa 1-413) from <i>G. stearothermophilus</i> NRS 2004/3a with N-terminal His <sub>6</sub> -tag; Km <sup>R</sup>                                                 | This study            |
| pNGB200                                   | pET28a-WsaP; pET28a(+) expressing WsaP (aa 1-471) from <i>G. stearothermophilus</i> NRS 2004/3a with N-terminal His <sub>6</sub> -tag; Km <sup>R</sup>                                                 | (22)                  |
| pNGB261                                   | pET28a-RmlB; pET-28a(+) expressing RmlB from <i>G. stearothermophilus</i> NRS 2004/3a with N-terminal His <sub>6</sub> -tag; Km <sup>R</sup>                                                           | This study            |
| pNGB262                                   | pET28a-RmlC; pET-28a(+) expressing RmlC from <i>G. stearothermophilus</i> NRS 2004/3a with N-terminal His <sub>6</sub> -tag; Km <sup>R</sup>                                                           | This study            |
| pNGB263                                   | pET28a-RmlD; pET-28a(+) expressing RmlD from <i>G. stearothermophilus</i> NRS 2004/3a with N-terminal His <sub>6</sub> -tag; Km <sup>R</sup>                                                           | This study            |

**Table S2:** PCR primers used for the amplification of WsaD, WsaC, WsaE, WsaF, RmlB, RmlC and RmlD from *G. stearothermophilus* NRS 2004/3a for the design of different expression constructs.

| Primer         | Nucleotide sequence (5' → 3')                                   | Orientation |
|----------------|-----------------------------------------------------------------|-------------|
| pET-WsaD_for   | AATCACC <u>AT</u> <u>ATG</u> GATATTAGCATTATTATCGTGAAT           | forward     |
| pET-WsaD_rev   | ATAAGAAT <u>CTCGAG</u> <u>TTA</u> ACCACCTATTTTTCGAAAAGTGT       | reverse     |
| pET-WsaD_I_rev | AATCA <u>CTCGAG</u> <u>CTA</u> ATGCTTCCTATGGAATAAAAACATC        | reverse     |
| pET-WsaC_for   | AATCACC <u>AT</u> <u>ATG</u> GAGATGCCATTGGTTT                   | forward     |
| pET-WsaC_rev   | ATAAGAAT <u>CTCGAG</u> <u>CTA</u> ATATTTTAACTTTTTAAAAATCCATATTG | reverse     |
| pET-WsaC_I_rev | AATCA <u>CTCGAG</u> <u>CTA</u> TTGACTAAATTTTTTCTAGCTTCCG        | reverse     |
| pET-WsaE_for   | AATCAGCTAGC <u>ATG</u> GAGCGTTGTAGAATGAATAA                     | forward     |
| pET-WsaE_B_for | AATCAGCTAGC <u>ATG</u> CGTATTAAGAATAGATTAATAA                   | forward     |
| pET-WsaE_C_for | AATCAGCTAGC <u>ATG</u> GGCTTTCGAAAAGGTTTTG                      | forward     |
| pET-WsaE_rev   | ATAAGAAT <u>CTCGAG</u> <u>CTA</u> CGACCTTATTGTTGGAATCAAA        | reverse     |
| pET-WsaE_A_rev | ATAAGAAT <u>CTCGAG</u> <u>CTA</u> AACCAATGGATAATCCTCTG          | reverse     |
| pET-WsaE_N_rev | ATAAGAAT <u>CTCGAG</u> <u>CTA</u> CATAGACTCAGCTTGGTTTTGC        | reverse     |
| pET-WsaE_M_rev | ATAAGAAT <u>CTCGAG</u> <u>CTA</u> TATCTTCCGTTTCCTCTAGG          | reverse     |
| pET-WsaF_for   | GGGGTACCC <u>AT</u> <u>ATG</u> gTTCAAAAATTAATACAGATATTAAG       | forward     |
| pET-WsaF_rev   | GGGGTACCC <u>GAGCTCG</u> AAAATAAACCTACGAATAGAGTCA <u>TCA</u>    | reverse     |
| RmlB_for       | AATCAGCTAGC <u>ATG</u> AAAGTATTGATTACCGGC                       | forward     |
| RmlB_rev       | AATCA <u>CTCGAG</u> CCTAACTGCCCGTTTGC                           | reverse     |
| RmlC_for       | AATCACC <u>AT</u> <u>ATG</u> gAAATTATTGAGACTAAGTTTAGTAATG       | forward     |
| RmlC_rev       | AATCA <u>CTCGAG</u> CTGCATTCCTTCC <u>TTA</u> ATAAG              | reverse     |
| RmlD_for       | AATCACC <u>AT</u> <u>ATG</u> gAAATTGTTGTTACGGGGG                | forward     |
| RmlD_rev       | AATCA <u>CTCGAG</u> GATCTATTGTAAATATATCACT <u>TCA</u> AATC      | reverse     |

Triplets corresponding to the initiation and termination codons in the primer sequence are boxed. Lowercase letters indicate changes in the original nucleotides sequence. Artificial restriction sites are underlined.

**Table S3:** ESI-QTOF MS analysis of octyl-linked products of *in vitro* activity assays.

| Sample                      | [M+Na] <sup>+</sup> <sub>exp</sub> | [M+Na] <sup>+</sup> <sub>theor</sub> | assignment                     |
|-----------------------------|------------------------------------|--------------------------------------|--------------------------------|
| substrate (II)              | 461.22                             | 461.24                               | Rha-Gal-octyl                  |
| substrate (III)             | 607.25                             | 607.29                               | Rha-Rha-Gal-octyl              |
| WsaF + (II) + dTDP-β-L-Rha  | 607.26                             | 607.29                               | Rha-Rha-Gal-octyl (IV)         |
| WsaC + (III) + dTDP-β-L-Rha | 753.33                             | 753.35                               | Rha-Rha-Rha-Gal-octyl (V)      |
| WsaC + (III) + dTDP-β-L-Rha | 899.37                             | 899.41                               | Rha-Rha-Rha-Rha-Gal-octyl (VI) |
| WsaE + (III) + dTDP-β-L-Rha | 753.33                             | 753.35                               | Rha-Rha-Rha-Gal-octyl (VII)    |

References included in supplementary tables:

22. Steiner, K., Novotny, R., Patel, K., Vinogradov, E., Whitfield, C., Valvano, M. A., Messner, P., and Schäffer, C. (2007) *J. Bacteriol.* **189**, 2590-2598
67. Miroux, B. and Walker, J. E. (1996) *J. Mol. Biol.* **260**, 289-298

### SUPPLEMENTARY FIGURE LEGENDS

**Fig. S1. Reaction scheme** for the synthesis of β-D-Gal-(1→O)-octyl (I), α-L-Rha-(1→3)-β-D-Gal-(1→O)-octyl (II) and α-L-Rha-(1→3)-α-L-Rha-(1→3)-β-D-Gal-(1→O)-octyl (III) used as acceptors in this study.

**Fig. S2. Multiple sequence alignment of the N-terminal region of WsaC** from *G. stearothermophilus* NRS 2004/3a with putative rhamnosyltransferases of two different *Streptococcus pyogenes* strains, RgbB from *Lactococcus lactis* and RgpBc from *Streptococcus mutans*. Conserved amino acids described for inverting transferases are highlighted.

**Fig. S3. Sequence alignment** of the N-terminal region of WsaE from *G. stearothermophilus* NRS 2004/3a, containing the putative methyltransferase domain, with menaquinone biosynthesis methyltransferase (UbiE) from *Methanosarcina acetivorans* C2A.

**Fig. S4. Sequence alignment** of the C-terminal region of WsaE from *G. stearothermophilus* NRS 2004/3a, containing the putative rhamnosyltransferase domains, with O-antigen biosynthesis proteins from *Planctomyces maris* DSM 8797 and (protein accession number ZP\_01855298) and *Xanthomonas oryzae* (ABI93188) or the GT-2 glycosyltransferases from *Burkholderia cenocepacia* MC0-3 (ZP\_01563358) and *Enterococcus faecalis* (AAC35930).

**Fig. S5. A: Western immunoblot analysis of the expression of WsaC, WsaD and WsaF** in *E. coli* BL21 Star (DE3). Proteins were detected with anti-His-tag antibody. Lanes 1, 6 and 8: Precision Plus Protein<sup>TM</sup> Standard All Blue (Biorad); lane 2: WsaC (37 kDa); lane 3: WsaC\_I (36.5 kDa); lane 4: WsaD (30 kD); lane 5: WsaD\_I (31.6 kDa); lane 7: WsaF (50.5 kDa). **B: Western Immunoblot analysis of the expression of WsaE and truncated forms thereof** in *E. coli* BL21 Star (DE3). Proteins were detected with anti-His-tag antibody. Lane 1: Precision Plus Protein<sup>TM</sup> Standard All Blue (Biorad); lane 2: full length WsaE (135.0 kDa); lane 3: WsaE\_A (60.5 kDa; aa 368-863, first rhamnosyltransferase domain); lane 4: WsaE\_B (90.8 kDa; aa 368-1127, both rhamnosyltransferase domains); lane 5: WsaE\_C (44.1 kDa; aa 765-1127, C-terminal rhamnosyltransferase domain) lane 6: WsaE\_M (22.7 kDa; aa 1-170, UbiE domain); lane 7: WsaE\_N (46.8 kDa; aa 1-368, UbiE domain plus 200 aa downstream). For details about the truncated forms see Figure 1.



**Fig. S6. TLC pattern of rhamnosyltransferase activity assays using octyl-linked oligosaccharides.** For the reactions crude extract (WsaC and WsaD) or purified enzyme (WsaC\_I, WsaE and WsaF) were used and the products were separated on Silica TLC plates with chloroform/methanol/water 65:25:4 as solvent. Lanes 1-7: WsaD; lanes 12-18: WsaC; lanes 20-23: WsaC\_I; lanes 24-27: WsaE; lanes 28-31: WsaF; lanes 1, 12, 20, 24 and 28:  $\beta$ -D-Gal-(1 $\rightarrow$ O)-octyl (**I**) and dTDP- $\beta$ -L-Rha; lanes 2, 13, 21, 25 and 29:  $\alpha$ -L-Rha-(1 $\rightarrow$ 3)- $\beta$ -D-Gal-(1 $\rightarrow$ O)-octyl (**II**) and dTDP- $\beta$ -L-Rha; lanes 3, 14, 22, 26 and 30:  $\alpha$ -L-Rha-(1 $\rightarrow$ 3)- $\alpha$ -L-Rha-(1 $\rightarrow$ 3)- $\beta$ -D-Gal-(1 $\rightarrow$ O)-octyl (**III**) and dTDP- $\beta$ -L-Rha; lanes 4, 8 and 15: (**I**); lanes 5, 9 and 16: (**II**); lanes 6, 10 and 17: (**III**); lanes 7, 11, 18, 23, 27 and 31: dTDP- $\beta$ -L-Rha. Staining was performed with thymol.

**Fig. S7. (+)ESI-QTOF MS<sup>2</sup> spectrum of the singly charged ions at  $m/z$  899.40** corresponding to the product (**VI**) of the *in vitro* assay of WsaC; the loss of rhamnosides can be deduced from the mass difference of  $\sim$ 146 between neighboring Y-ions.

Figure S1

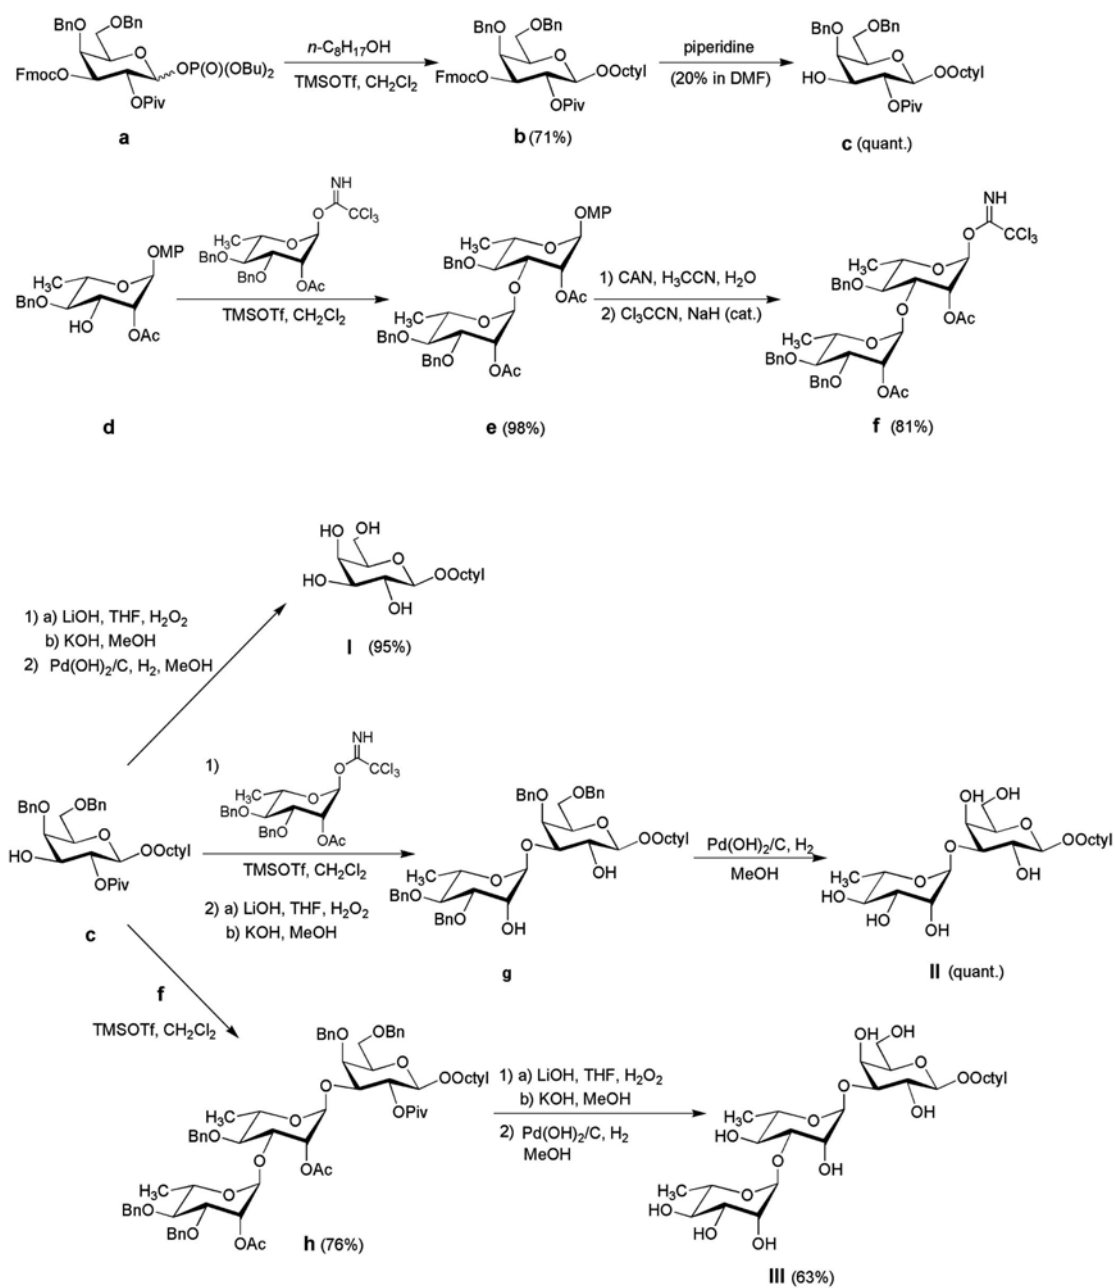

Figure S2

```

StrepPyo10394 ---MNINILLSTYN-GERFLAEQIQSIQRQTVNDWTLLIRDDGSTDGTQDIIRTFVK-ED 55
StrepPyo6180 ---MNINILLSTYN-GERFLAEQIQSIQRQTVNDWTLLIRDDGSTDGTQDIIRTFVK-ED 55
RgpBc ---MKVNILMSTYN-GQEFIAQQIQSIQKQTFENWNLLIRDDGSSDGTPKIIADFAK-SD 55
RgbBLac ---MRVNILMSTYN-GEKRVADQIESIQKQTYTDWNLIIIRDDGSSDRTCEIVDDFVS-KD 55
WsaC MEMPLVSIVVATYFPRTDFFEKQLQSLNNQTYENIEIIICDD SANDAEYEKVKKMVENII 60
      . :.*:::** . * .*::::** : ::* **:.:* . : :...

                                     DXDD
SP10394 KRIQWINEGQTENLGVIKNFYTLR-HQKADVFFSDQDDIWLDNKLEVTLLLEAQKHEMT 114
SP6180 KRIQWINEGQTENLGVIKNFYTLK-HQKADVFFSDQDDIWLDNKLEVTLLLEAQKHEMT 114
RgpBc ARIRFINADKRENFVGIKNFYTLK-YEKADYFFSDQDDVWLPQKLELTLASVEKENNQ 114
RgbBLac NRIKLIR---AENGVIKSFHELVTDSNNADYFFADQDDYWLPEKLSVMLEETKKHDNS 112
WsaC SRFPCKVIRNEKNVGSNKTFERLTQ-EANGDYICYCDQDDIWLSEKVERLVNHITKHHCT 119
      *: . :.* *.* * :.* :.**** ** :*. : *..

SP10394 APLLVYTDLKVVTDHLAICHDSMIKT----QSGHANTSLLQELTENTVTGGTMMITHALA 170
SP6180 APLLVYTDLKVVTDHLAICHDSMIKT----QSGHANTSLLQELTENTVTGGTMMITHALA 170
RgpBc IPLMVYTDLTVVDRDLQVLHDSMIKT----QSHHANTSLLLELTENTVTGGTMMVNHCLA 170
RgbBLac KPVMYYTDLKVTDRNLNVTSESMIRG----QSDHANTKLVQELTENTVTGGASMINHELA 168
WsaC ---LVYSDLSLIDENDRIIHKSFKRSNFRKLVHGDNTFAHLINRNSVTGCAMMIRADVA 176
      : **:. : . : .*: : . : *...: . :..*:* : * : :*

SP10394 EEWTTC--DGLLMHDWYLALLASATGKLVYLDIPTELYRQHDANVLGARTWS--KRMKNW 226
SP6180 EEWTTC--DGLLMHDWYLALLASATGKLVYLDIPTELYRQHDANVLGARTWS--KRMKNW 226
RgpBc KQWKQCY-DDLIMHDWYLALLAASLGKLIYLDETTELYRQHESNVLGARTWS--KRLKNW 227
RgbBLac QLWQST--NDIIMHDWYLAIVAAALGELVYIDQPTHLYRQHDANVLGARTLS--KRIKKW 224
WsaC KSAIPFPDYDEFVHDHWLAIHAAVKGSLGYIKEPLVWYRIHGLNQIGNQRLVNIITNINDY 236
      : . . :*** :*: * : *.* *:. . ** * .* :* : . .:..:

```

Figure S3

```

WsaE  MERCRCMNKIPFDQYQRYKNAAEIINLIREENQSFTIILEVGANEHRNLEHFLP-----KD 55
UbiE  -----MGRFLDSDFRRKLQSPDKLIDRSG-IKEGMHVLEVGCGSG-AFTTEVARTVGIKG 53
      *.:. : * :. : . : : * : : : : : * : * : * : : * : * :

```

  

```

WsaE  QVTIYLDIE-----VPEHLKHMTN-----YIEADATNMPLDDNAFDEVIALDVFEHLP 102
UbiE  EVYALDIQPGMLQLKEKISRPENRDIRNIKLIKGDAHNLEFDDNSFDLVYAITVIQELP 113
      :* ***: : * : * : * * : * : * : * : * : * : * : * : * : * : * :

```

  

```

WsaE  PDKRNQFLFEINRVAKEG-FLIAAPFNTEG---VEETEIRVNEYYKALYGEG----- 150
UbiE  --DKNKVLKEIKRVLKPGGILAVTEFLPDPDYPLKSTTIRLGEEAGLILDKVEGNLWHYT 171
      . : * : * : * : * * * : * : * : * : * : * : * : * : * :

```

Figure S4

WsaE KLSMELLS---EDPYEVFLNVSSKV---DKEIVLSEIKKLKYKPKF SVILP VYNVVEEKWL 617  
 AAC35930 RAKIEKLRNQAS--YPNWLARNEVL---DIEAMTQE IATFH YQPKI SIAMPVYNVVEEKWL 196  
 ZP01563358 DRTIDTLAGQSGNEYGDWVARYD T L S Q D D V S G I A A H I Q R L A Y R P L I S V L I P L Y N T P E P F L 229  
 ABI93188 AYANGSN-----AQALVSTSIDKYADWMRAQPRIVAPADVGLI SIVMPVCNTPENFL 100  
 ZP01855298 PRRYQDMTSN---YDVWSRV TGIKEAEEILTRLP ELKSP----LISLILP TYN TKEKIL 391  
  
 WsaE RKCIDSVLNQWYPY WELCIVDDNSKDYIKPVLEEYSNRDSRIKTVFRSNNGHI SEASNT 677  
 AAC35930 RLCIDSILNQVYINWELCMADDAS TDPNVKKILTEYQQLDERIRVVFREQNGHI SEATNS 256  
 ZP01563358 IRCIESVREQLYDHWELCLVDDAS P Q P H V Q R I C E R Y A A Q D S R I R Y M R R E T N G H I A E A T N S 289  
 ABI93188 REAVASVEAQIYLNWELCIHDDAS D Q P H I G R M L D E L C D R L P N V R V S R S T M R Q G I A A T T N A 160  
 ZP01855298 RACIESVLAQTYSNWELCIADDAS T K S R V R D V I N E Y S K Q D S R I K S V F R T E N G H I S E A M I S 451  
  
 WsaE ALEIATGDFIALLDHDD ELAPEALYENAVLLNEHPDADMIYSDEDKITKDGKRHSPILFKP 737  
 AAC35930 ALAIATGEFVALLDNDD ELAINAFYEVVKVLNENPELDLIYSDEDKIDMDGNRSDPAFKP 316  
 ZP01563358 ALSLATGEFSALLDHDDELAAHALYMVVVELNKQPDLDMLYSDEDKIDEQCKRYEPWFKS 349  
 ABI93188 ALAMANGRWITFLDHDDILEPDALAAVVACHDGTSA-EVVYTDHDVIGEDGRLRYPYFKP 219  
 ZP01855298 AAELMEGDYISFLDHDELNKNALLFIVDAINRSPSEFFYSDEDDHINEHGKHQSPFFKP 511  
  
 WsaE DWSPD T L R S Q M Y I G H L I V Y R T N L V R Q L G G F R K G F E G S Q D Y D L A L R V A E K T -- N N I Y H I P K 795  
 AAC35930 DWSPDLLLGTNYISHLGVYRRSILEEIEGGFRKGYEGSQDYDLVLRFTTEKTTKERITHIPK 376  
 ZP01563358 DWNYDMLLSQNAVVHLAVYRTSILREIEGFRSAFNGSQDYDVTLRFFSEQTTPERIRHIPF 409  
 ABI93188 DWDLDFLSQMYLGHLLISFDAALVRHMGGLRSDCDGSQDYDLVLRCAIFG--ATVAHVPK 277  
 ZP01855298 DWSPSLLCSQNYIGHFLCLSKSLYERVGGIRRGFDGAQDYDLVLRAGDAA--ENVYHIPK 569  
  
 WsaE ILYSWREIETSTAVNPSKPYAHEAGL KALNEHLERLVFGKGKAWAEETEYLFVYDVRYAI 855  
 AAC35930 VLYYWRMLPTSTAVDQGSKGYAFEAGLRAVQDALVRR-GINGHATHG-AANGLYDVYYDI 434  
 ZP01563358 ILYHWRAISGSVALATTEKLYPYEAAERAI REHLERT-GRSATVKRQ-PHLGGYQVTWPV 467  
 ABI93188 VLYHWRAHAGSTAANAGSKPYAHHAGRLALQNHMQLAHPG--ANVADGSQLFCYDVRYPY 335  
 ZP01855298 VLYHWREHENSTSSNSECKPYAHDAGKAAVADFLNQKYGSRFIKVNDGEGFLTYSPOQFRF 629  
  
 WsaE PEDYPLVSIIIPTKDNIELSSCTQSILDKTTPNYEILIMNNSVMEETYSWFDKQKEN 915  
 AAC35930 ES-EKLVSIIIPTKNGYKDVQRCSVSSIEKTTYQNYEILIMADNGSTDPKMHELYAEFEQQ 493  
 ZP01563358 PAPEPKVAIIIPTKDKVELLRVAVDSILEKTTYVNYEIVIVNRSVEASTMEYFAQVQES 527  
 ABI93188 ADSGPLASIIIPTRDGLDLRTCVESIYAKTLYRDFEIIIVVDNGSSKPETLEWLQGMRR 395  
 ZP01855298 D-SEHRVSIIIPTKDKIDLDDCIESIRNRSSHINWELLIVDNRSEETASKEYFSTVVQD 688  
  
 WsaE S--KIRIIDAMYEFNWSKLNHNGIREANGEV FVFLNNDTIVISEDWLQRLVEKALREDVG 973  
 AAC35930 LPGRFFVESIDIPFNFSIINNRAAKKAHGEYLLFLNNDTEVITENWLTLMVSFAQQERTG 553  
 ZP01563358 P--KVRLLDYDKPYSFAALNNWAVTQTDAPLLA FVNNDEI E V I E P N W L R E M V G H A L R P E V G 585  
 ABI93188 D--SFRVIHADIPFNWSALNNLAAREARGEVLVFLNNDTEIIDGEWLQRLAENALRPDVG 453  
 ZP01855298 S--RIKVVEADV EFNWSMINNIGAKAATGDV FVFLNNDTLVITPDWLEKLASMASLPEVG 746  
  
 WsaE TVGGLLLYEDNTIQHAGVVI G M G G W A D H V Y K G M H P V H N T S P F I S P V I N R N V S A S T G A C L A 1033  
 AAC35930 CVGAKLLYPNNTVQHAGVILGLGGVAGHGHYGY-PHGDLGYFGRLAINVNYSAVTAACL 612  
 ZP01563358 SVGAKLLYPNGTIQHSQVVGIGGLAGHPHVGE-PGETTFGYFGRAACTQRYSAVTAACVV 644  
 ABI93188 VCGPLLLYGDRTIQHAGVVI G M G G W A D H V F K G E A P V H N Q N L F V S P L L Q R Q V L A V T G A C M V 513  
 ZP01855298 LVGPQLLYEDNTIQHAGVVI G M G G W A D H V F K N Q L P V H R S G P F V S P M L N R N V L A I T G A C Q V 806  
  
 WsaE IAKKVIEKIGGFNEE-FIICGSDVEISLRALKMGYVNTYDPYVRLYHLESKT-----R1085  
 AAC35930 MKKADFDAVGGFEEA-FTVAFNDVDLCLKVQALGRDNVWLHEAELYHFESQTRGYDDK GK 671  
 ZP01563358 MRREVFLVSGFDEVNFVAFNDVDLGMRLGQAGYANVWTPRALLEPHHESASLGLPTNED 704  
 ABI93188 VARETFESLGGFDES-FIVCGSDVELCLRARLHGLATVYVARSVMIHLESKT-----RD 566  
 ZP01855298 IERAKFEQLGGFDEQ-FIICGSDVDICIRAHQQGLQNVYCADAAALHLESKS-----RS 859  
  
 WsaE DSFIPERDFELSAKYSP-YREIGDPYYNQNLSYNHLIPTIRS 1127  
 AAC35930 KKKRFEQEKVMMEEKWGP-LIEN-DPFYNPNLTRDIP----- 706  
 ZP01563358 RRRQFLEECDNFRRIWAD-VIRN-DPFYNPNLTISGGDFRPNF 762  
 ABI93188 PREIPESDFVRSQAQAYS PYREE-GDPFFSPNLDYMASSPRLRG 611  
 ZP01855298 S-FIPKQDFLMSEIRYAPYRNDKGD P Y F N E N L D L M S T M P R M L T 903

Figure S5

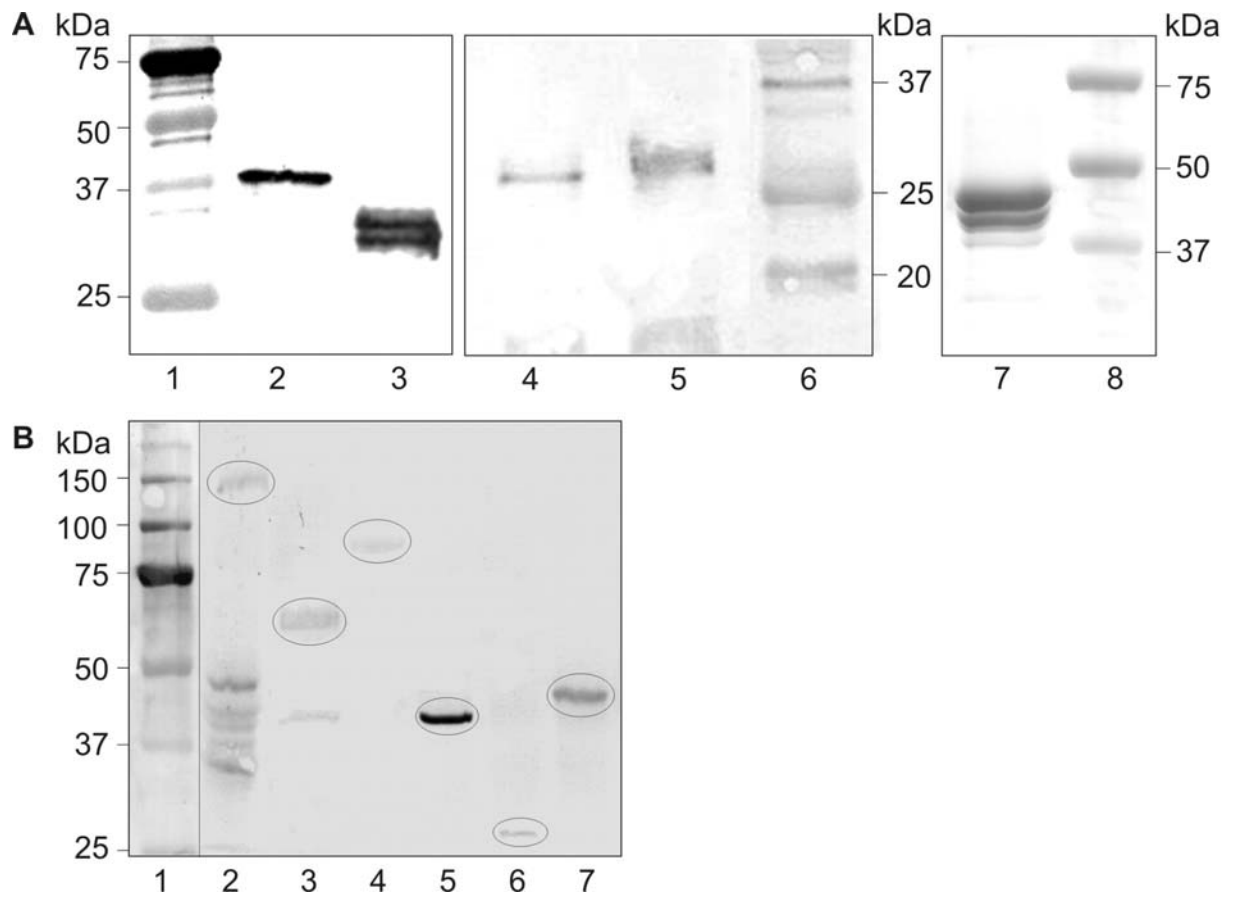

Figure S6

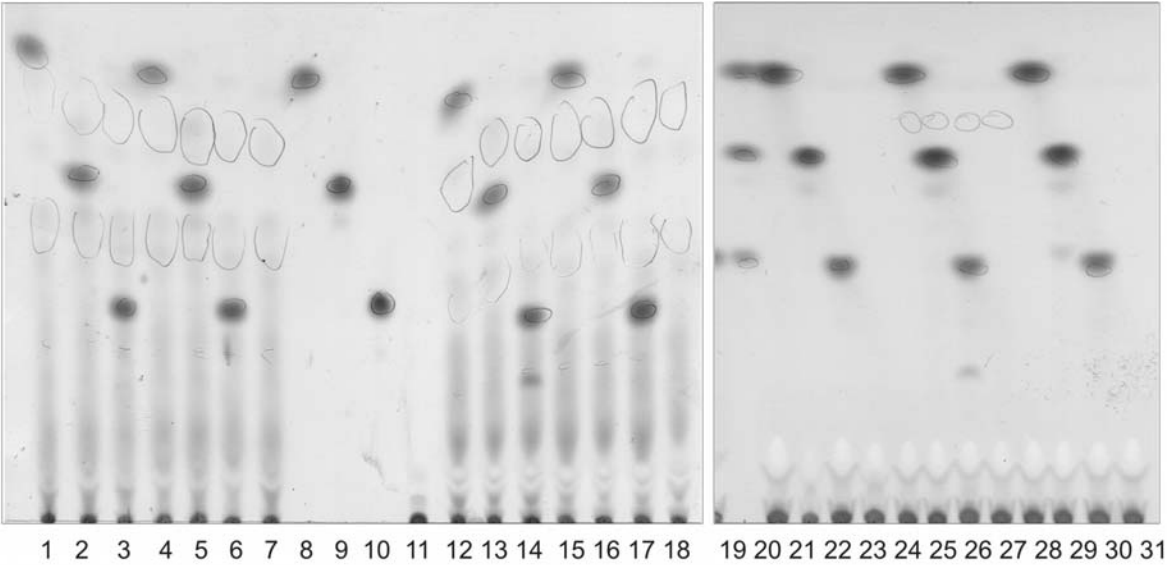

Figure S7

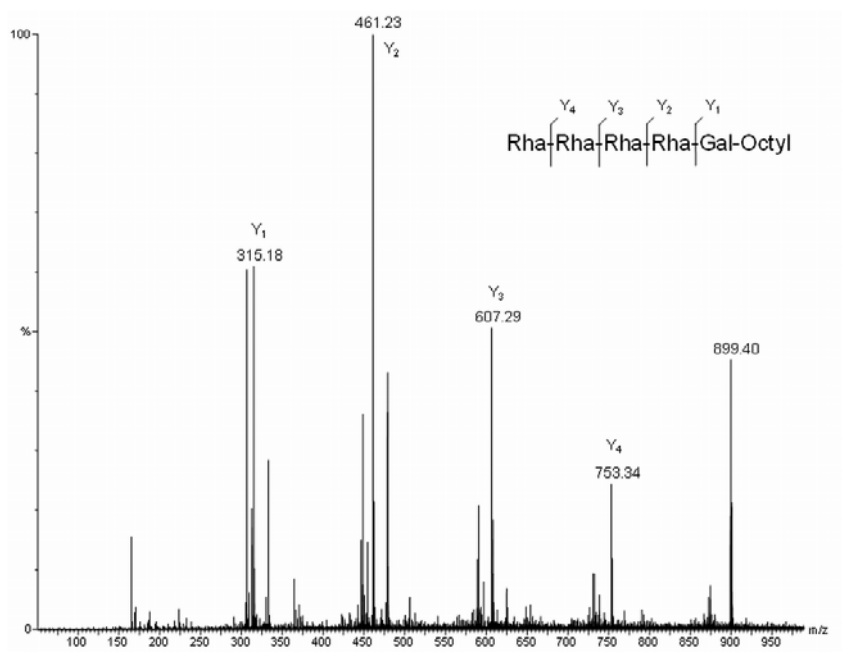

Supplement: supp_M801833200_Steiner_et_al_revision_supplement.pdf [file supp_M801833200_Steiner_et_al_revision_supplement.pdf]
